# Supplementary material for: Psychosocial Workplace Factors and Healthcare Utilization: A Study of Two Employers
Source: PubMed Central journal article supplement (PMC6037501; doi:10.15171/ijhpm.2017.132), 2017-11-26
Supplement: ijhpm-7-614-s001.pdf [file ijhpm-7-614-s001.pdf]

**Table S1. Descriptive Statistics for all respondents in the LTC setting**

|                                                                     | <b>LTC<br/>Wave 1<br/>(n=1524)<sup>1</sup></b> | <b>LTC<br/>Wave 2<br/>(n=1275)<sup>1</sup></b> | <b>LTC<br/>Wave 3<br/>(n=1083)<sup>1</sup></b> |
|---------------------------------------------------------------------|------------------------------------------------|------------------------------------------------|------------------------------------------------|
| <b>Variable</b>                                                     | <i>Mean (SD) or<br/>Percent</i>                | <i>Mean (SD) or<br/>Percent</i>                | <i>Mean (SD) or Percent</i>                    |
| Percent with at least one Future ER/Urgent Care Visit <sup>2</sup>  | 18.5%                                          | 17.8%                                          | 17.0%                                          |
| Number of Future ER/Urgent Care Visits (if > 0 visits) <sup>2</sup> | 1.6 (1.9)                                      | 1.5 (1.6)                                      | 1.7 (1.9)                                      |
| Percent with at least one Future Other Healthcare <sup>2</sup>      | 28.2%                                          | 25.1%                                          | 22.6%                                          |
| Future Other Healthcare Visits (if > 0 visits) <sup>2</sup>         | 4.1 (4.8)                                      | 4.4 (5.8)                                      | 4.6 (5.5)                                      |
| Schedule Control (1-5 scale)                                        | 2.65 (0.7)                                     | 2.6 (0.8)                                      | 2.6 (0.8)                                      |
| Job Demands (1-5 scale)                                             | 3.8 (0.8)                                      | 3.8 (0.7)                                      | 3.75 (0.7)                                     |
| Decision Authority (1-5 scale)                                      | 3.5 (0.8)                                      | 3.4 (0.7)                                      | 3.5 (0.7)                                      |
| Work-to-Family Conflict (1-5 scale)                                 | 2.8 (0.9)                                      | 2.8 (0.9)                                      | 2.7 (0.9)                                      |
| Job insecurity (1-5 scale) <sup>3</sup>                             | 3.4 (0.7)                                      | 3.3 (0.7)                                      | 3.3 (0.7)                                      |
| Tenure (years)                                                      | 6.3 (6.5)                                      | 7.3 (6.7)                                      | 8.2 (7.0)                                      |
| Work Hours (this job)                                               | 36.9 (7.2)                                     | 36.8 (7.7)                                     | 36.5 (7.4)                                     |
| Psychological Distress                                              | 11.9 (4.3)                                     | 11.5 (4.2)                                     | 11.3 (4.2)                                     |
| Body Mass Index (kg/m <sup>2</sup> )                                | 29.5 (7.0)                                     | 29.4 (6.7)                                     | 29.7 (6.8)                                     |
| Age (years)                                                         | 38.5 (12.5)                                    | 39.5 (12.4)                                    | 40.1 (12.4)                                    |
| High Blood Pressure                                                 | 24.5%                                          | 25.1%                                          | 27.1%                                          |
| Smokes                                                              | 30.3%                                          | 27.5%                                          | 26.0%                                          |
| Diabetes                                                            | 8.2%                                           | 8.2%                                           | 9.4%                                           |
| Heart Attack or MI                                                  | 1.5%                                           | 1.7%                                           | 2.0%                                           |
| Stroke                                                              | 1.3%                                           | 1.2%                                           | 1.7%                                           |
| Hours in Bed                                                        | 7.4 (2.1)                                      | 7.3 (1.5)                                      | 7.3 (1.5)                                      |
| Annual Personal Income                                              |                                                |                                                |                                                |
| ≤\$9,999                                                            | 2.8%                                           | 1.6%                                           | 1.8%                                           |
| \$10,000-\$19,999                                                   | 14.0%                                          | 13.3%                                          | 11.6%                                          |
| \$20,000-\$29,999                                                   | 33.7%                                          | 32.5%                                          | 33.5%                                          |
| \$30,000-\$39,999                                                   | 19.0%                                          | 19.4%                                          | 19.5%                                          |
| \$40,000-\$49,999                                                   | 12.1%                                          | 11.6%                                          | 10.5%                                          |
| \$50,000-\$59,999                                                   | 9.8%                                           | 10.1%                                          | 11.5%                                          |
| >\$60,000                                                           | 8.5%                                           | 8.4%                                           | 8.5%                                           |
| Married/living with partner                                         | 62.9%                                          | 61.3%                                          | 62.6%                                          |
| Number of children                                                  | 1.0 (1.2)                                      | 1.1 (1.2)                                      | 1.2 (1.2)                                      |
| Household Size                                                      | 3.1 (1.5)                                      | 3.1 (1.4)                                      | 3.1 (1.7)                                      |
| Provides care outside work                                          | 30.1%                                          | 27.1%                                          | 24.1%                                          |
| Female                                                              | 91.8%                                          | 92.55%                                         | 92.24%                                         |
| Educational Attainment                                              |                                                |                                                |                                                |
| Less than High School Graduate                                      | 5.78%                                          | 5.65%                                          | 6.00%                                          |
| High School Graduate                                                | 32.50%                                         | 31.61%                                         | 31.67%                                         |

|                               |        |        |        |
|-------------------------------|--------|--------|--------|
| Some College/Technical School | 49.64% | 50.35% | 50.42% |
| College Graduate              | 12.08% | 12.39% | 11.91% |

1. Sample size reflects the maximum number of responses per question (some questions had fewer responses).  
2. These variables are for the survey following the ones in which the characteristics were measured. For example, the baseline survey had 1522 respondents. The 6 month survey had 1275 respondents. The question about health care utilization in the 6 month survey covered the period of time just after the baseline, so there are fewer people in the estimation sample than represented here.  
3. Very Likely=1, Fairly Likely=2, Not too likely=3, Not at all likely=4, Will voluntarily leave company in next 12 months= 5

**Table S2. Descriptive Statistics for all respondents in the IT setting**

|                                                                     | <b>IT<br/>Wave 1<br/>(n=823)<sup>1</sup></b> | <b>IT<br/>Wave 2<br/>(n=717)<sup>1</sup></b> | <b>IT<br/>Wave 3<br/>(n=701)<sup>1</sup></b> |
|---------------------------------------------------------------------|----------------------------------------------|----------------------------------------------|----------------------------------------------|
| <b>Variable</b>                                                     | <i>Mean (SD) or<br/>Percent</i>              | <i>Mean (SD) or<br/>Percent</i>              | <i>Mean (SD) or<br/>Percent</i>              |
| Percent with at least one Future ER/Urgent Care Visit <sup>2</sup>  | 8.1%                                         | 8.4%                                         | 7.7%                                         |
| Number of Future ER/Urgent Care Visits (if > 0 visits) <sup>2</sup> | 1.4 (1.4)                                    | 1.2 (0.5)                                    | 1.2 (0.4)                                    |
| Percent with at least one Future Other Healthcare <sup>2</sup>      | 37.7%                                        | 39.5%                                        | 35.3%                                        |
| Future Other Healthcare Visits (if > 0 visits) <sup>2</sup>         | 3.9 (5.5)                                    | 3.6 (5.5)                                    | 4.5 (6.1)                                    |
| Schedule Control (1-5 scale)                                        | 3.6 (0.7)                                    | 3.7 (0.7)                                    | 3.8 (0.7)                                    |
| Job Demands (1-5 scale)                                             | 3.6 (0.7)                                    | 3.5 (0.7)                                    | 3.5 (0.7)                                    |
| Decision Authority (1-5 scale)                                      | 3.8 (0.7)                                    | 3.9 (0.7)                                    | 3.9 (0.7)                                    |
| Work-to-Family Conflict (1-5 scale)                                 | 3.1 (0.9)                                    | 2.9 (0.9)                                    | 2.9 (0.9)                                    |
| Job insecurity (1-5 scale) <sup>3</sup>                             | 2.7 (0.8)                                    | 2.6 (0.8)                                    | 2.7 (0.7)                                    |
| Tenure (years)                                                      | 13.7 (9.2)                                   | 14.4 (9.1)                                   | 14.88 (9.1)                                  |
| Work Hours (this job)                                               | 45.4 (5.7)                                   | 45 (5.5)                                     | 45.2 (6.1)                                   |
| Psychological Distress                                              | 10.9 (3.2)                                   | 10.4 (3.1)                                   | 10.3 (3.3)                                   |
| Body Mass Index (kg/m <sup>2</sup> )                                | 28.2 (5.7)                                   | 28.1 (5.5)                                   | 28.3 (5.7)                                   |
| Age (years)                                                         | 45.7 (9.0)                                   | 46.6 (8.8)                                   | 47.3 (8.7)                                   |
| High Blood Pressure                                                 | 27.5%                                        | 27.0%                                        | 30.3%                                        |
| Smokes                                                              | 6.7%                                         | 5.7%                                         | 5.9%                                         |
| Diabetes                                                            | 7.4%                                         | 8.7%                                         | 10.0%                                        |
| Previous Heart Attack or MI                                         | 1.3%                                         | 1.5%                                         | 1.6%                                         |
| Stroke                                                              | 1.2%                                         | 1.3%                                         | 1.7%                                         |
| Hours in Bed                                                        | 7.3 (1.0)                                    | 7.4 (0.9)                                    | 7.4 (1.0)                                    |
| Annual Personal Income                                              |                                              |                                              |                                              |
| <\$60,000                                                           | 3.7%                                         | 2.9%                                         | 2.9%                                         |
| \$60,000-\$79,999                                                   | 27.5%                                        | 25.3%                                        | 21.7%                                        |
| \$80,000-\$99,999                                                   | 36.5%                                        | 36.6%                                        | 37.4%                                        |
| \$100,000-\$119,999                                                 | 24.9%                                        | 27.1%                                        | 26.8%                                        |
| >\$120,000                                                          | 7.4%                                         | 8.1%                                         | 8.7%                                         |
| Married/living with partner                                         | 79.3%                                        | 80.6%                                        | 81.2%                                        |
| Number of children                                                  | 1.0 (1.1)                                    | 1.0 (1.1)                                    | 1.9 (0.4)                                    |

|                                                                                                                                                                                                                                                                                                                                                                                                                                                                                                                                                                                                                                                                 |           |           |           |
|-----------------------------------------------------------------------------------------------------------------------------------------------------------------------------------------------------------------------------------------------------------------------------------------------------------------------------------------------------------------------------------------------------------------------------------------------------------------------------------------------------------------------------------------------------------------------------------------------------------------------------------------------------------------|-----------|-----------|-----------|
| Household Size                                                                                                                                                                                                                                                                                                                                                                                                                                                                                                                                                                                                                                                  | 2.9 (1.4) | 2.9 (1.3) | 2.9 (1.4) |
| Provides care outside work                                                                                                                                                                                                                                                                                                                                                                                                                                                                                                                                                                                                                                      | 23.5%     | 22.7%     | 22.4%     |
| Female                                                                                                                                                                                                                                                                                                                                                                                                                                                                                                                                                                                                                                                          | 39.1%     | 37.9%     | 38.7%     |
| Educational Attainment                                                                                                                                                                                                                                                                                                                                                                                                                                                                                                                                                                                                                                          |           |           |           |
| Less than High School Graduate                                                                                                                                                                                                                                                                                                                                                                                                                                                                                                                                                                                                                                  | 0.0%      | 0.0%      | 0.0%      |
| High School Graduate                                                                                                                                                                                                                                                                                                                                                                                                                                                                                                                                                                                                                                            | 3.8%      | 2.8%      | 3.1%      |
| Some College/Technical School                                                                                                                                                                                                                                                                                                                                                                                                                                                                                                                                                                                                                                   | 18.6%     | 18.6%     | 18.1%     |
| College Graduate                                                                                                                                                                                                                                                                                                                                                                                                                                                                                                                                                                                                                                                | 77.6%     | 78.7%     | 78.7%     |
| <p>1. Sample size reflects the maximum number of responses per question (some questions had fewer responses).</p> <p>2. These variables are for the survey following the ones in which the characteristics were measured. For example, the baseline survey had 823 respondents. The 6 month survey had 717 respondents. The question about health care utilization in the 6 month survey covered the period of time just after the baseline, so there are fewer people in the estimation sample than represented here.</p> <p>3. Very Likely=1, Fairly Likely=2, Not too likely=3, Not at all likely=4, Will voluntarily leave company in next 12 months= 5</p> |           |           |           |

**Table S3. Sensitivity Analyses of Having Any Visits (Leaf Sample)**

|                                 | Any Emergency/ Urgent Care Visits                                                    |                                                                          |                                                                                  | Any other Healthcare                                                                 |                                                                          |                                                                                  |
|---------------------------------|--------------------------------------------------------------------------------------|--------------------------------------------------------------------------|----------------------------------------------------------------------------------|--------------------------------------------------------------------------------------|--------------------------------------------------------------------------|----------------------------------------------------------------------------------|
|                                 | (1)<br>Sample:<br>Original,<br>Completed all<br>waves,<br>completed case<br>analysis | (1a)<br>Sample:<br>Completed all<br>waves, may<br>have missing<br>values | (1b)<br>Sample:<br>Completed at<br>least one wave,<br>may have<br>missing values | (2)<br>Sample:<br>Original,<br>Completed all<br>waves,<br>completed case<br>analysis | (2a)<br>Sample:<br>Completed all<br>waves, may<br>have missing<br>values | (2b)<br>Sample:<br>Completed at<br>least one wave,<br>may have<br>missing values |
|                                 | Odds Ratio<br>(SE)                                                                   | Odds Ratio<br>(SE)                                                       | Odds Ratio<br>(SE)                                                               | Odds Ratio<br>(SE)                                                                   | Odds Ratio<br>(SE)                                                       | Odds Ratio<br>(SE)                                                               |
| Schedule Control                | 1.03<br>(0.09)                                                                       | 1.01<br>(0.09)                                                           | 1.03<br>(0.08)                                                                   | 0.97<br>(0.07)                                                                       | 0.95<br>(0.07)                                                           | 1.00<br>(0.07)                                                                   |
| Above median job demands        | 1.04<br>(0.13)                                                                       | 1.00<br>(0.12)                                                           | 1.07<br>(0.11)                                                                   | 1.37**<br>(0.14)                                                                     | 1.32**<br>(0.13)                                                         | 1.32**<br>(0.12)                                                                 |
| Below median decision authority | 0.94<br>(0.12)                                                                       | 0.92<br>(0.11)                                                           | 0.94<br>(0.10)                                                                   | 0.90<br>(0.10)                                                                       | 0.88<br>(0.09)                                                           | 0.85+<br>(0.08)                                                                  |
| Work-to-Family Conflict         | 1.15*<br>(0.08)                                                                      | 1.15*<br>(0.08)                                                          | 1.10<br>(0.07)                                                                   | 1.05<br>(0.06)                                                                       | 1.05<br>(0.06)                                                           | 1.05<br>(0.06)                                                                   |
| Job insecurity                  | 0.92<br>(0.22)                                                                       | 0.85<br>(0.19)                                                           | 0.94<br>(0.18)                                                                   | 0.74<br>(0.14)                                                                       | 0.80<br>(0.14)                                                           | 0.79<br>(0.13)                                                                   |

|                                |                  |                  |                  |                  |                 |                 |
|--------------------------------|------------------|------------------|------------------|------------------|-----------------|-----------------|
| Tenure constructed             | 0.98+<br>(0.01)  | 0.98+<br>(0.01)  | 0.98*<br>(0.01)  | 0.98+<br>(0.01)  | 0.98+<br>(0.01) | 0.99<br>(0.01)  |
| Work Hours (this job)          | 0.99<br>(0.01)   | 0.99<br>(0.01)   | 0.99<br>(0.01)   | 0.99<br>(0.01)   | 0.99<br>(0.01)  | 0.99<br>(0.01)  |
| Psychological Distress         | 1.05**<br>(0.01) | 1.05**<br>(0.01) | 1.04**<br>(0.01) | 1.03*<br>(0.02)  | 1.02+<br>(0.01) | 1.03*<br>(0.01) |
| BMI (by category)              |                  |                  |                  |                  |                 |                 |
| Normal or Underweight (BMI<25) | reference        | reference        | reference        | reference        | reference       | reference       |
| Overweight (BMI≥25 & BMI<30)   | 1.02<br>(0.17)   | 1.05<br>(0.17)   | 1.03<br>(0.15)   | 1.06<br>(0.15)   | 1.06<br>(0.15)  | 1.02<br>(0.13)  |
| Obese (BMI≥30)                 | 1.40*<br>(0.22)  | 1.39*<br>(0.21)  | 1.38*<br>(0.18)  | 1.44**<br>(0.20) | 1.35*<br>(0.18) | 1.25+<br>(0.15) |
| Age                            | 1<br>(0.01)      | 1.00<br>(0.01)   | 0.99<br>(0.01)   | 1.01<br>(0.01)   | 1.01<br>(0.01)  | 1.00<br>(0.00)  |
| Hypertension                   | 1.28<br>(0.19)   | 1.24<br>(0.18)   | 1.25+<br>(0.16)  | 0.95<br>(0.13)   | 1.02<br>(0.13)  | 1.01<br>(0.12)  |
| Smokes                         | 1.34*<br>(0.19)  | 1.40*<br>(0.19)  | 1.39**<br>(0.16) | 0.90<br>(0.12)   | 0.92<br>(0.12)  | 0.97<br>(0.11)  |
| Diabetes                       | 0.61+<br>(0.16)  | 0.70<br>(0.17)   | 0.68+<br>(0.15)  | 1.48+<br>(0.31)  | 1.33<br>(0.27)  | 1.32<br>(0.24)  |
| Heart Disease                  | 0.99<br>(0.66)   | 0.91<br>(0.54)   | 0.93<br>(0.47)   | 0.85<br>(0.43)   | 0.90<br>(0.42)  | 0.98<br>(0.39)  |
| Stroke                         | 2.15<br>(1.12)   | 1.78<br>(0.89)   | 1.68<br>(0.85)   | 0.70<br>(0.35)   | 0.94<br>(0.43)  | 0.98<br>(0.44)  |
| Hours in Bed                   | 0.99<br>(0.04)   | 0.99<br>(0.04)   | 0.98<br>(0.04)   | 0.94<br>(0.04)   | 0.94<br>(0.04)  | 0.96<br>(0.03)  |
| Annual Personal Income         |                  |                  |                  |                  |                 |                 |
| ≤\$9,999                       | 2.48+<br>(1.31)  | 2.22+<br>(1.00)  | 1.46<br>(0.58)   | 0.70<br>(0.31)   | 1.04<br>(0.40)  | 0.91<br>(0.32)  |
| \$10,000(\$19,999)             | 1.31<br>(0.46)   | 1.10<br>(0.36)   | 1.08<br>(0.32)   | 0.86<br>(0.23)   | 0.85<br>(0.22)  | 0.95<br>(0.23)  |
| \$20,000(\$29,999)             | 1.67+<br>(0.51)  | 1.56<br>(0.45)   | 1.59+<br>(0.41)  | 0.75<br>(0.17)   | 0.79<br>(0.18)  | 0.90<br>(0.19)  |
| \$30,000(\$39,999)             | 1.74+<br>(0.54)  | 1.71+<br>(0.50)  | 1.63+<br>(0.42)  | 1.05<br>(0.24)   | 1.02<br>(0.22)  | 1.11<br>(0.23)  |
| \$40,000(\$49,999)             | 2.00*<br>(0.64)  | 1.73+<br>(0.53)  | 1.58+<br>(0.43)  | 1.01<br>(0.24)   | 0.92<br>(0.21)  | 1.08<br>(0.23)  |
| \$50,000(\$59,999)             | 1.83*<br>(0.56)  | 1.81*<br>(0.53)  | 1.56+<br>(0.41)  | 1.01<br>(0.21)   | 0.99<br>(0.20)  | 0.97<br>(0.19)  |
| >\$60,000                      | reference        | reference        | reference        | reference        | reference       | reference       |
| Married/living with partner    | 1.01<br>(0.14)   | 1.00<br>(0.13)   | 0.99<br>(0.11)   | 0.99<br>(0.12)   | 0.93<br>(0.11)  | 0.89<br>(0.09)  |

|                                                                                                             |                  |                  |                  |                  |                  |                  |
|-------------------------------------------------------------------------------------------------------------|------------------|------------------|------------------|------------------|------------------|------------------|
| Number of children                                                                                          | 1.04<br>(0.08)   | 0.99<br>(0.07)   | 0.99<br>(0.06)   | 0.89+<br>(0.06)  | 0.92<br>(0.05)   | 0.90+<br>(0.05)  |
| Household Size                                                                                              | 0.94<br>(0.07)   | 0.98<br>(0.06)   | 0.96<br>(0.05)   | 1.01<br>(0.05)   | 1.01<br>(0.04)   | 1.02<br>(0.04)   |
| Provides care outside work                                                                                  | 1.22<br>(0.16)   | 1.20<br>(0.15)   | 1.17<br>(0.13)   | 1.03<br>(0.12)   | 1.02<br>(0.11)   | 1.06<br>(0.10)   |
| Male                                                                                                        | 0.91<br>(0.24)   | 0.96<br>(0.23)   | 0.92<br>(0.20)   | 0.75<br>(0.18)   | 0.76<br>(0.18)   | 0.76<br>(0.15)   |
| Educational Attainment                                                                                      |                  |                  |                  |                  |                  |                  |
| Less than High School Graduate                                                                              | 0.79<br>(0.32)   | 0.89<br>(0.33)   | 0.79<br>(0.25)   | 0.41**<br>(0.14) | 0.43**<br>(0.13) | 0.39**<br>(0.11) |
| High School Graduate                                                                                        | 1.2<br>(0.3)     | 1.22<br>(0.29)   | 1.04<br>(0.22)   | 0.58**<br>(0.12) | 0.52**<br>(0.10) | 0.47**<br>(0.08) |
| Some College/Technical School                                                                               | 1.31<br>(0.3)    | 1.21<br>(0.26)   | 1.05<br>(0.20)   | 0.83<br>(0.15)   | 0.81<br>(0.14)   | 0.75+<br>(0.11)  |
| College Graduate                                                                                            | reference        | reference        | reference        | reference        | reference        | reference        |
| Constant                                                                                                    | 0.06**<br>(0.05) | 0.07**<br>(0.06) | 0.13**<br>(0.09) | 0.56<br>(0.44)   | 0.57<br>(0.43)   | 0.59<br>(0.37)   |
| # Observations                                                                                              | 2466             | 2659             | 3112             | 2463             | 2659             | 3112             |
| # Individuals                                                                                               | 822              | 927              | 1275             | 821              | 927              | 1275             |
| + p<0.10, * p<0.05, ** p<0.01                                                                               |                  |                  |                  |                  |                  |                  |
| Notes: Regression also controlled for employer health insurance status, state, intervention group, and time |                  |                  |                  |                  |                  |                  |

**Table S4. Sensitivity Analyses of Having Any Visits (Tomo Sample)**

|                                 | Any Emergency/ Urgent Care Visits                                                 |                                                                       |                                                                                  | Any other Healthcare                                                                 |                                                                          |                                                                                  |
|---------------------------------|-----------------------------------------------------------------------------------|-----------------------------------------------------------------------|----------------------------------------------------------------------------------|--------------------------------------------------------------------------------------|--------------------------------------------------------------------------|----------------------------------------------------------------------------------|
|                                 | (1)<br>Sample:<br>Original,<br>Completed all<br>waves, completed<br>case analysis | (1a)<br>Sample:<br>Completed all<br>waves, may have<br>missing values | (1b)<br>Sample:<br>Completed at<br>least one wave,<br>may have<br>missing values | (2)<br>Sample:<br>Original,<br>Completed all<br>waves,<br>completed case<br>analysis | (2a)<br>Sample:<br>Completed all<br>waves, may<br>have missing<br>values | (2b)<br>Sample:<br>Completed at<br>least one wave,<br>may have<br>missing values |
|                                 | Odds Ratio<br>(SE)                                                                | Odds Ratio<br>(SE)                                                    | Odds Ratio<br>(SE)                                                               | Odds Ratio<br>(SE)                                                                   | Odds Ratio<br>(SE)                                                       | Odds Ratio<br>(SE)                                                               |
| Schedule Control                | 0.73+<br>(0.12)                                                                   | 0.84<br>(0.13)                                                        | 0.90<br>(0.13)                                                                   | 0.96<br>(0.10)                                                                       | 0.99<br>(0.10)                                                           | 0.93<br>(0.09)                                                                   |
| Above median job demands        | 0.84<br>(0.20)                                                                    | 0.91<br>(0.20)                                                        | 0.90<br>(0.19)                                                                   | 1.01<br>(0.14)                                                                       | 1.01<br>(0.13)                                                           | 1.04<br>(0.13)                                                                   |
| Below median decision authority | 0.96<br>(0.22)                                                                    | 0.91<br>(0.19)                                                        | 0.84<br>(0.17)                                                                   | 0.77+<br>(0.11)                                                                      | 0.84<br>(0.11)                                                           | 0.85<br>(0.10)                                                                   |
| Work-to-Family Conflict         | 0.95                                                                              | 0.93                                                                  | 1.00                                                                             | 1.35**                                                                               | 1.32**                                                                   | 1.26**                                                                           |

|                                |                 |                 |                 |                  |                  |                 |
|--------------------------------|-----------------|-----------------|-----------------|------------------|------------------|-----------------|
|                                | (0.15)          | (0.14)          | (0.14)          | (0.12)           | (0.11)           | (0.10)          |
| Job insecurity                 | 0.88<br>(0.22)  | 0.87<br>(0.20)  | 0.87<br>(0.19)  | 0.97<br>(0.13)   | 0.91<br>(0.11)   | 0.91<br>(0.11)  |
| Tenure constructed             | 0.99<br>(0.02)  | 0.98<br>(0.02)  | 0.98<br>(0.02)  | 0.99<br>(0.01)   | 0.99<br>(0.01)   | 0.99<br>(0.01)  |
| Work Hours (this job)          | 1.01<br>(0.02)  | 1.02<br>(0.02)  | 1.00<br>(0.02)  | 0.98<br>(0.01)   | 0.99<br>(0.01)   | 0.99<br>(0.01)  |
| Psychological Distress         | 1.02<br>(0.04)  | 1.03<br>(0.03)  | 1.04<br>(0.03)  | 1.02<br>(0.02)   | 1.03<br>(0.02)   | 1.02<br>(0.02)  |
| BMI (by category)              |                 |                 |                 |                  |                  |                 |
| Normal or Underweight (BMI<25) | reference       | reference       | reference       | reference        | reference        | reference       |
| Overweight (BMI≥25 & BMI<30)   | 1.22<br>(0.34)  | 1.05<br>(0.27)  | 1.14<br>(0.28)  | 1.10<br>(0.17)   | 1.07<br>(0.16)   | 1.20<br>(0.17)  |
| Obese (BMI≥30)                 | 1.30<br>(0.39)  | 1.30<br>(0.37)  | 1.37<br>(0.37)  | 1.22<br>(0.22)   | 1.13<br>(0.19)   | 1.34+<br>(0.21) |
| Age                            | 1.01<br>(0.02)  | 1.01<br>(0.02)  | 1.01<br>(0.02)  | 1.02+<br>(0.01)  | 1.02*<br>(0.01)  | 1.02*<br>(0.01) |
| Hypertension                   | 1.36<br>(0.36)  | 1.11<br>(0.28)  | 1.13<br>(0.26)  | 1.11<br>(0.17)   | 1.21<br>(0.17)   | 1.19<br>(0.16)  |
| Smokes                         | 2.44*<br>(0.91) | 2.15*<br>(0.76) | 2.23*<br>(0.71) | 0.78<br>(0.23)   | 0.81<br>(0.22)   | 1.00<br>(0.24)  |
| Diabetes                       | 1.57<br>(0.59)  | 1.42<br>(0.50)  | 1.53<br>(0.46)  | 2.19**<br>(0.54) | 2.09**<br>(0.49) | 1.70*<br>(0.37) |
| Heart Disease                  | 0.44<br>(0.47)  | 0.37<br>(0.38)  | 0.34<br>(0.34)  | 1.02<br>(0.51)   | 1.16<br>(0.56)   | 1.57<br>(0.71)  |
| Stroke                         | 2.29<br>(2.35)  | 2.04<br>(2.15)  | 1.82<br>(1.88)  | 1.53<br>(0.81)   | 1.18<br>(0.64)   | 1.40<br>(0.75)  |
| Hours in Bed                   | 1.06<br>(0.13)  | 1.02<br>(0.11)  | 1.02<br>(0.10)  | 1.13+<br>(0.08)  | 1.12+<br>(0.08)  | 1.10<br>(0.07)  |
| Annual Personal Income         |                 |                 |                 |                  |                  |                 |
| ≤\$9,999                       | 0.72<br>(0.92)  | 0.68<br>(0.67)  | 0.67<br>(0.58)  | 0.97<br>(0.68)   | 0.84<br>(0.46)   | 0.81<br>(0.39)  |
| \$10,000(\$19,999)             | 1.10<br>(1.14)  | 1.17<br>(0.81)  | 1.22<br>(0.83)  | 0.99<br>(0.54)   | 0.81<br>(0.28)   | 0.79<br>(0.26)  |
| \$20,000(\$29,999)             | 0.95<br>(0.90)  | 1.08<br>(0.70)  | 1.09<br>(0.70)  | 1.26<br>(0.67)   | 0.96<br>(0.30)   | 0.94<br>(0.29)  |
| \$30,000(\$39,999)             | 0.44<br>(0.42)  | 0.67<br>(0.44)  | 0.80<br>(0.52)  | 1.22<br>(0.66)   | 0.94<br>(0.31)   | 0.96<br>(0.30)  |
| \$40,000(\$49,999)             | 1.16<br>(1.18)  | 1.44<br>(1.02)  | 1.50<br>(1.04)  | 1.08<br>(0.62)   | 0.82<br>(0.31)   | 0.85<br>(0.32)  |
| \$50,000(\$59,999)             | 0.51<br>(0.69)  | 1.36<br>(1.36)  | 0.98<br>(0.98)  | 0.58<br>(0.43)   | 0.55<br>(0.31)   | 0.59<br>(0.30)  |

|                               |                 |                 |                  |                 |                 |                 |
|-------------------------------|-----------------|-----------------|------------------|-----------------|-----------------|-----------------|
| >\$60,000                     | reference       | reference       | reference        | reference       | reference       | reference       |
| Married/living with partner   | 0.52+<br>(0.17) | 0.52*<br>(0.16) | 0.47**<br>(0.13) | 0.68+<br>(0.14) | 0.64*<br>(0.12) | 0.69*<br>(0.12) |
| Number of children            | 1.03<br>(0.18)  | 0.93<br>(0.14)  | 1.02<br>(0.15)   | 0.82<br>(0.10)  | 0.80+<br>(0.09) | 0.81+<br>(0.09) |
| Household Size                | 1.23<br>(0.18)  | 1.28*<br>(0.15) | 1.27*<br>(0.15)  | 1.12<br>(0.12)  | 1.17<br>(0.12)  | 1.16<br>(0.11)  |
| Provides care outside work    | 0.75<br>(0.20)  | 0.85<br>(0.20)  | 0.88<br>(0.19)   | 1.32+<br>(0.19) | 1.17<br>(0.16)  | 1.19<br>(0.15)  |
| Male                          | 0.69<br>(0.19)  | 0.73<br>(0.19)  | 0.74<br>(0.18)   | 0.82<br>(0.13)  | 0.78+<br>(0.11) | 0.76*<br>(0.10) |
| Educational Attainment        |                 |                 |                  |                 |                 |                 |
| Grade 12 or GED               | 1.35<br>(0.83)  | 0.80<br>(0.49)  | 0.71<br>(0.37)   | 0.50<br>(0.29)  | 0.48<br>(0.25)  | 0.59<br>(0.24)  |
| Some College/Technical School | 0.78<br>(0.28)  | 0.86<br>(0.29)  | 0.78<br>(0.25)   | 1.23<br>(0.24)  | 1.21<br>(0.22)  | 1.12<br>(0.19)  |
| College Graduate              | reference       | reference       | reference        | reference       | reference       | reference       |
| # Individuals                 | 490             | 582             | 695              | 490             | 582             | 695             |
| # Observations                | 1470            | 1640            | 1806             | 1470            | 1640            | 1806            |

+ p<0.10, \* p<0.05, \*\* p<0.01

Notes: Job category, Intervention group, time, randomization, and a merger indicator were also included in the model.

Table S5. Sensitivity Analyses of Number of Visits (Leef Sample)

|                                 | # Emergency/ Urgent Care Visits                                                |                                                                    |                                                                               | # other Healthcare Visits                                                         |                                                                       |                                                                               |
|---------------------------------|--------------------------------------------------------------------------------|--------------------------------------------------------------------|-------------------------------------------------------------------------------|-----------------------------------------------------------------------------------|-----------------------------------------------------------------------|-------------------------------------------------------------------------------|
|                                 | (1) Sample:<br>Original, Completed<br>all waves,<br>completed case<br>analysis | (1a) Sample:<br>Completed all<br>waves, may have<br>missing values | (1b) Sample:<br>Completed at<br>least one wave,<br>may have<br>missing values | (2) Sample:<br>Original,<br>Completed all<br>waves,<br>completed case<br>analysis | (2a) Sample:<br>Completed all<br>waves, may<br>have missing<br>values | (2b) Sample:<br>Completed at<br>least one wave,<br>may have<br>missing values |
|                                 | Incidence Rate<br>Ratios<br>(SE)                                               | Incidence Rate<br>Ratios (SE)                                      | Incidence Rate<br>Ratios (SE)                                                 | Incidence Rate<br>Ratios (SE)                                                     | Incidence Rate<br>Ratios (SE)                                         | Incidence Rate<br>Ratios (SE)                                                 |
| Schedule Control                | 0.95<br>(0.08)                                                                 | 0.94<br>(0.08)                                                     | 1.01<br>(0.08)                                                                | 0.92<br>(0.08)                                                                    | 0.91<br>(0.08)                                                        | 0.95<br>(0.07)                                                                |
| Above median job demands        | 1.15<br>(0.13)                                                                 | 1.11<br>(0.12)                                                     | 1.14<br>(0.11)                                                                | 1.36*<br>(0.17)                                                                   | 1.32*<br>(0.15)                                                       | 1.37**<br>(0.15)                                                              |
| Below median decision authority | 0.92<br>(0.11)                                                                 | 0.89<br>(0.10)                                                     | 0.90<br>(0.10)                                                                | 0.90<br>(0.12)                                                                    | 0.89<br>(0.11)                                                        | 0.82+<br>(0.09)                                                               |
| Work(to)Family Conflict         | 1.06<br>(0.07)                                                                 | 1.06<br>(0.07)                                                     | 1.13+<br>(0.08)                                                               | 1.11<br>(0.08)                                                                    | 1.11<br>(0.08)                                                        | 1.07<br>(0.07)                                                                |
| Job insecurity                  | 0.96<br>(0.23)                                                                 | 0.94<br>(0.21)                                                     | 1.00<br>(0.19)                                                                | 0.74<br>(0.15)                                                                    | 0.77<br>(0.15)                                                        | 0.81<br>(0.15)                                                                |
| Tenure constructed              | 0.98+<br>(0.01)                                                                | 0.99<br>(0.01)                                                     | 0.99<br>(0.01)                                                                | 0.98<br>(0.01)                                                                    | 0.98<br>(0.01)                                                        | 0.99<br>(0.01)                                                                |
| Work Hours (this job)           | 0.99<br>(0.01)                                                                 | 0.99<br>(0.01)                                                     | 0.99<br>(0.01)                                                                | 0.99<br>(0.01)                                                                    | 0.99<br>(0.01)                                                        | 0.99<br>(0.01)                                                                |
| Psychological Distress          | 1.06**<br>(0.01)                                                               | 1.06**<br>(0.01)                                                   | 1.05**<br>(0.01)                                                              | 1.06**<br>(0.02)                                                                  | 1.06**<br>(0.02)                                                      | 1.07**<br>(0.02)                                                              |
| BMI (by category)               |                                                                                |                                                                    |                                                                               |                                                                                   |                                                                       |                                                                               |
| Normal or Underweight (BMI<25)  | reference                                                                      | reference                                                          | reference                                                                     | reference                                                                         | reference                                                             | reference                                                                     |
| Overweight (BMI≥25 & BMI<30)    | 1.38+<br>(0.24)                                                                | 1.35+<br>(0.22)                                                    | 1.35+<br>(0.22)                                                               | 1.07<br>(0.17)                                                                    | 1.09<br>(0.17)                                                        | 1.04<br>(0.15)                                                                |
| Obese (BMI≥30)                  | 1.39*<br>(0.20)                                                                | 1.34*<br>(0.18)                                                    | 1.38**<br>(0.17)                                                              | 1.52**<br>(0.22)                                                                  | 1.47**<br>(0.20)                                                      | 1.35*<br>(0.17)                                                               |
| Age                             | 1.00<br>(0.01)                                                                 | 1.00<br>(0.01)                                                     | 1.00<br>(0.01)                                                                | 1.01<br>(0.01)                                                                    | 1.01<br>(0.01)                                                        | 1.00<br>(0.01)                                                                |
| Hypertension                    | 1.09<br>(0.16)                                                                 | 1.07<br>(0.15)                                                     | 1.06<br>(0.13)                                                                | 0.99<br>(0.15)                                                                    | 1.03<br>(0.15)                                                        | 1.04<br>(0.14)                                                                |
| Smokes                          | 1.05<br>(0.14)                                                                 | 1.17<br>(0.15)                                                     | 1.29*<br>(0.16)                                                               | 0.83<br>(0.12)                                                                    | 0.84<br>(0.11)                                                        | 0.93<br>(0.11)                                                                |
| Diabetes                        | 0.66+<br>(0.16)                                                                | 0.72<br>(0.16)                                                     | 0.69+<br>(0.14)                                                               | 1.26<br>(0.29)                                                                    | 1.20<br>(0.27)                                                        | 1.16<br>(0.24)                                                                |



|                                |                  |                  |                 |                  |                  |                  |
|--------------------------------|------------------|------------------|-----------------|------------------|------------------|------------------|
| Heart Disease                  | 0.93<br>(0.45)   | 0.87<br>(0.37)   | 0.92<br>(0.34)  | 0.72<br>(0.30)   | 0.74<br>(0.28)   | 0.97<br>(0.34)   |
| Stroke                         | 1.71<br>(0.69)   | 1.48<br>(0.58)   | 1.39<br>(0.58)  | 0.59<br>(0.29)   | 0.81<br>(0.34)   | 0.71<br>(0.30)   |
| Hours in Bed                   | 0.91*<br>(0.04)  | 0.92*<br>(0.04)  | 0.94+<br>(0.04) | 0.93+<br>(0.04)  | 0.93+<br>(0.04)  | 0.95<br>(0.03)   |
| Annual Personal Income         |                  |                  |                 |                  |                  |                  |
| ≤\$9,999                       | 3.05*<br>(1.52)  | 3.60**<br>(1.55) | 2.71*<br>(1.07) | 0.48<br>(0.22)   | 1.18<br>(0.54)   | 0.99<br>(0.41)   |
| \$10,000-\$19,999              | 1.68<br>(0.56)   | 1.51<br>(0.48)   | 1.84*<br>(0.57) | 0.94<br>(0.28)   | 0.89<br>(0.26)   | 1.06<br>(0.28)   |
| \$20,000-\$29,999              | 1.70+<br>(0.51)  | 1.67+<br>(0.47)  | 1.79*<br>(0.45) | 0.86<br>(0.22)   | 0.86<br>(0.22)   | 1.04<br>(0.24)   |
| \$30,000-\$39,999              | 1.60+<br>(0.45)  | 1.63+<br>(0.44)  | 1.61*<br>(0.38) | 0.96<br>(0.23)   | 0.95<br>(0.22)   | 1.08<br>(0.24)   |
| \$40,000-\$49,999              | 1.85+<br>(0.58)  | 1.65<br>(0.50)   | 1.54<br>(0.42)  | 1.05<br>(0.26)   | 0.98<br>(0.24)   | 1.11<br>(0.26)   |
| \$50,000-\$59,999              | 1.94*<br>(0.60)  | 1.95*<br>(0.58)  | 1.78*<br>(0.48) | 0.84<br>(0.19)   | 0.90<br>(0.20)   | 0.88<br>(0.18)   |
| >\$60,000                      | reference        | reference        | reference       | reference        | reference        | reference        |
| Married/living with partner    | 0.96<br>(0.13)   | 0.94<br>(0.12)   | 0.98<br>(0.12)  | 0.99<br>(0.13)   | 0.92<br>(0.12)   | 0.90<br>(0.10)   |
| Number of children             | 1.07<br>(0.09)   | 1.04<br>(0.07)   | 1.01<br>(0.07)  | 1.04<br>(0.08)   | 1.05<br>(0.07)   | 1.00<br>(0.06)   |
| Household Size                 | 0.92<br>(0.06)   | 0.94<br>(0.05)   | 0.93<br>(0.05)  | 0.95<br>(0.05)   | 0.96<br>(0.05)   | 1.00<br>(0.05)   |
| Provides care outside work     | 1.47**<br>(0.20) | 1.39*<br>(0.19)  | 1.30*<br>(0.16) | 0.94<br>(0.14)   | 0.92<br>(0.13)   | 1.00<br>(0.12)   |
| Male                           | 0.82<br>(0.21)   | 0.84<br>(0.20)   | 0.92<br>(0.19)  | 0.69<br>(0.21)   | 0.76<br>(0.21)   | 0.67<br>(0.17)   |
| Educational Attainment         |                  |                  |                 |                  |                  |                  |
| Less than High School Graduate | 0.82<br>(0.32)   | 0.94<br>(0.34)   | 0.89<br>(0.27)  | 0.31**<br>(0.13) | 0.32**<br>(0.12) | 0.24**<br>(0.08) |
| High School Graduate           | 1.39<br>(0.35)   | 1.41<br>(0.34)   | 1.32<br>(0.27)  | 0.43**<br>(0.10) | 0.43**<br>(0.10) | 0.35**<br>(0.07) |
| Some College/Technical School  | 1.36<br>(0.32)   | 1.29<br>(0.29)   | 1.18<br>(0.23)  | 0.70+<br>(0.14)  | 0.74<br>(0.14)   | 0.61**<br>(0.10) |
| College Graduate               | reference        | reference        | reference       | reference        | reference        | reference        |
| Constant                       | 0.20+<br>(0.17)  | 0.21+<br>(0.17)  | 0.20*<br>(0.14) | 2.11<br>(1.62)   | 2.00<br>(1.48)   | 2.25<br>(1.43)   |
| # Observations                 | 2466             | 2659             | 3112            | 2463             | 2659             | 3112             |

|                                                                                                      |     |     |      |     |     |      |
|------------------------------------------------------------------------------------------------------|-----|-----|------|-----|-----|------|
| # Individuals                                                                                        | 822 | 927 | 1275 | 821 | 927 | 1275 |
| + p<0.10, * p<0.05, ** p<0.01                                                                        |     |     |      |     |     |      |
| Notes: Regression also controlled for Employer insurance status, state, intervention group, and time |     |     |      |     |     |      |

**Table S6. Sensitivity Analyses of Number of Visits (Tomo Sample)**

|                                 | (1) Sample:<br>Original,<br>Completed all<br>waves,<br>completed<br>case analysis | (1a) Sample:<br>Completed all<br>waves, may<br>have missing<br>values | (1b) Sample:<br>Completed at<br>least one<br>wave, may<br>have missing<br>values | (2) Sample:<br>Original,<br>Completed<br>all waves,<br>completed<br>case analysis | (2a) Sample:<br>Completed<br>all waves,<br>may have<br>missing<br>values | (2b) Sample:<br>Completed<br>at least one<br>wave, may<br>have missing<br>values |
|---------------------------------|-----------------------------------------------------------------------------------|-----------------------------------------------------------------------|----------------------------------------------------------------------------------|-----------------------------------------------------------------------------------|--------------------------------------------------------------------------|----------------------------------------------------------------------------------|
|                                 | Incidence Rate<br>Ratios<br>(SE)                                                  | Incidence Rate<br>Ratios (SE)                                         | Incidence Rate<br>Ratios (SE)                                                    | Incidence<br>Rate Ratios<br>(SE)                                                  | Incidence<br>Rate Ratios<br>(SE)                                         | Incidence<br>Rate Ratios<br>(SE)                                                 |
| Schedule Control                | 0.71*<br>(0.11)                                                                   | 0.82<br>(0.13)                                                        | 0.86<br>(0.13)                                                                   | 1.21<br>(0.14)                                                                    | 1.23+<br>(0.14)                                                          | 1.15<br>(0.13)                                                                   |
| Above median job demands        | 0.72<br>(0.17)                                                                    | 0.79<br>(0.17)                                                        | 0.80<br>(0.17)                                                                   | 0.83<br>(0.12)                                                                    | 0.82<br>(0.11)                                                           | 0.84<br>(0.11)                                                                   |
| Below median decision authority | 0.94<br>(0.19)                                                                    | 0.91<br>(0.17)                                                        | 0.86<br>(0.16)                                                                   | 1.07<br>(0.14)                                                                    | 1.09<br>(0.13)                                                           | 1.04<br>(0.12)                                                                   |
| Work-to-Family Conflict         | 1.01<br>(0.16)                                                                    | 0.99<br>(0.15)                                                        | 1.05<br>(0.15)                                                                   | 1.35**<br>(0.12)                                                                  | 1.37**<br>(0.12)                                                         | 1.40**<br>(0.12)                                                                 |
| Job insecurity                  | 0.83<br>(0.19)                                                                    | 0.83<br>(0.17)                                                        | 0.84<br>(0.17)                                                                   | 0.80+<br>(0.10)                                                                   | 0.76*<br>(0.09)                                                          | 0.75*<br>(0.09)                                                                  |
| Tenure constructed              | 0.97<br>(0.02)                                                                    | 0.97+<br>(0.02)                                                       | 0.97*<br>(0.02)                                                                  | 0.98*<br>(0.01)                                                                   | 0.98*<br>(0.01)                                                          | 0.98*<br>(0.01)                                                                  |
| Work Hours (this job)           | 1.03<br>(0.02)                                                                    | 1.03<br>(0.02)                                                        | 1.01<br>(0.02)                                                                   | 0.98<br>(0.01)                                                                    | 0.98<br>(0.01)                                                           | 0.99<br>(0.01)                                                                   |
| Psychological Distress          | 0.98<br>(0.04)                                                                    | 1.00<br>(0.03)                                                        | 1.01<br>(0.03)                                                                   | 1.09**<br>(0.02)                                                                  | 1.09**<br>(0.02)                                                         | 1.07**<br>(0.02)                                                                 |
| BMI (by category)               |                                                                                   |                                                                       |                                                                                  |                                                                                   |                                                                          |                                                                                  |
| Normal or Underweight (BMI<25)  | reference                                                                         | reference                                                             | reference                                                                        | reference                                                                         | reference                                                                | reference                                                                        |
| Overweight (BMI≥25 & BMI<30)    | 1.46<br>(0.36)                                                                    | 1.29<br>(0.31)                                                        | 1.35<br>(0.31)                                                                   | 0.86<br>(0.14)                                                                    | 0.86<br>(0.13)                                                           | 0.90<br>(0.13)                                                                   |
| Obese (BMI≥30)                  | 1.37<br>(0.37)                                                                    | 1.36<br>(0.35)                                                        | 1.39<br>(0.34)                                                                   | 1.02<br>(0.18)                                                                    | 1.03<br>(0.17)                                                           | 1.10<br>(0.18)                                                                   |
| Age                             | 1.01<br>(0.02)                                                                    | 1.02<br>(0.02)                                                        | 1.02<br>(0.02)                                                                   | 1.02*<br>(0.01)                                                                   | 1.02*<br>(0.01)                                                          | 1.02*<br>(0.01)                                                                  |
| Hypertension                    | 1.20<br>(0.30)                                                                    | 0.99<br>(0.23)                                                        | 1.01<br>(0.22)                                                                   | 1.23<br>(0.19)                                                                    | 1.28+<br>(0.18)                                                          | 1.28+<br>(0.18)                                                                  |
| Smokes                          | 1.87+<br>(0.64)                                                                   | 1.72+<br>(0.56)                                                       | 1.78*<br>(0.50)                                                                  | 0.74<br>(0.29)                                                                    | 0.74<br>(0.27)                                                           | 0.82<br>(0.26)                                                                   |
| Diabetes                        | 1.75<br>(0.63)                                                                    | 1.52<br>(0.51)                                                        | 1.62+<br>(0.46)                                                                  | 1.12<br>(0.23)                                                                    | 1.10<br>(0.22)                                                           | 1.04<br>(0.20)                                                                   |
| Heart Disease                   | 0.44<br>(0.44)                                                                    | 0.41<br>(0.36)                                                        | 0.36<br>(0.32)                                                                   | 0.79<br>(0.21)                                                                    | 0.78<br>(0.19)                                                           | 1.07<br>(0.30)                                                                   |
| Stroke                          | 1.95<br>(1.71)                                                                    | 1.80<br>(1.72)                                                        | 1.67<br>(1.55)                                                                   | 1.80<br>(0.70)                                                                    | 1.65<br>(0.65)                                                           | 1.90+<br>(0.73)                                                                  |
| Hours in Bed                    | 1.08                                                                              | 1.03                                                                  | 1.04                                                                             | 1.01                                                                              | 1.01                                                                     | 1.03                                                                             |

|                               |                 |                  |                  |                  |                  |                  |
|-------------------------------|-----------------|------------------|------------------|------------------|------------------|------------------|
|                               | (0.13)          | (0.11)           | (0.10)           | (0.06)           | (0.06)           | (0.06)           |
| Annual Personal Income        |                 |                  |                  |                  |                  |                  |
| ≤\$9,999                      | 0.78<br>(1.00)  | 0.69<br>(0.66)   | 0.74<br>(0.59)   | 2.66<br>(2.03)   | 2.16<br>(1.26)   | 2.01<br>(1.10)   |
| \$10,000-\$19,999             | 1.37<br>(1.45)  | 1.36<br>(0.87)   | 1.36<br>(0.87)   | 2.42<br>(1.47)   | 1.79+<br>(0.56)  | 1.65+<br>(0.50)  |
| \$20,000-\$29,999             | 1.60<br>(1.62)  | 1.47<br>(0.92)   | 1.45<br>(0.91)   | 2.37<br>(1.40)   | 1.80*<br>(0.52)  | 1.78*<br>(0.50)  |
| \$30,000-\$39,999             | 0.71<br>(0.72)  | 0.83<br>(0.53)   | 0.92<br>(0.58)   | 2.65<br>(1.57)   | 2.07*<br>(0.61)  | 2.13**<br>(0.61) |
| \$40,000-\$49,999             | 1.62<br>(1.69)  | 1.57<br>(1.06)   | 1.55<br>(1.03)   | 2.52<br>(1.56)   | 2.12*<br>(0.74)  | 2.45**<br>(0.83) |
| \$50,000-\$59,999             | 1.45<br>(2.08)  | 2.04<br>(1.97)   | 1.51<br>(1.49)   | 1.10<br>(0.93)   | 0.81<br>(0.51)   | 0.79<br>(0.41)   |
| >\$60,000                     | reference       | reference        | reference        | reference        | reference        | reference        |
| Married/living with partner   | 0.62<br>(0.18)  | 0.55*<br>(0.14)  | 0.51**<br>(0.13) | 0.85<br>(0.17)   | 0.82<br>(0.15)   | 0.93<br>(0.16)   |
| Number of children            | 1.07<br>(0.16)  | 0.98<br>(0.13)   | 1.05<br>(0.13)   | 0.75**<br>(0.08) | 0.74**<br>(0.07) | 0.75**<br>(0.07) |
| Household Size                | 1.21+<br>(0.14) | 1.27**<br>(0.12) | 1.26*<br>(0.11)  | 1.14*<br>(0.07)  | 1.16*<br>(0.07)  | 1.12+<br>(0.07)  |
| Provides care outside work    | 0.83<br>(0.22)  | 0.91<br>(0.22)   | 0.93<br>(0.20)   | 1.26<br>(0.19)   | 1.18<br>(0.17)   | 1.23<br>(0.17)   |
| Male                          | 0.74<br>(0.18)  | 0.76<br>(0.17)   | 0.75<br>(0.16)   | 0.73*<br>(0.11)  | 0.72*<br>(0.11)  | 0.65**<br>(0.09) |
| Educational Attainment        |                 |                  |                  |                  |                  |                  |
| Grade 12 or GED               | 1.67<br>(0.88)  | 1.03<br>(0.56)   | 1.00<br>(0.46)   | 0.78<br>(0.41)   | 0.74<br>(0.35)   | 0.87<br>(0.32)   |
| Some College/Technical School | 0.86<br>(0.28)  | 0.90<br>(0.27)   | 0.84<br>(0.25)   | 1.36<br>(0.27)   | 1.37+<br>(0.26)  | 1.25<br>(0.23)   |
| College Graduate              | reference       | reference        | reference        | reference        | reference        | reference        |
| Constant                      | 0.05<br>(0.11)  | 0.04+<br>(0.08)  | 0.04+<br>(0.07)  | 0.04**<br>(0.05) | 0.05**<br>(0.05) | 0.05**<br>(0.05) |
| # Individuals                 | 490             | 1640             | 1806             | 490              | 1639             | 1805             |
| # Observations                | 1470            | 582              | 695              | 1470             | 582              | 695              |

+ p<0.10, \* p<0.05, \*\* p<0.01

Notes: Job category, Intervention group, time, randomization, and a merger indicator were also included in the model.
